# Supplementary material for: Polysulfide Na2S4 regulates the activation of PTEN/Akt/CREB signaling and cytotoxicity mediated by 1,4-naphthoquinone through formation of sulfur adducts
Source: PubMed Central journal article supplement (PMC5500523; doi:10.1038/s41598-017-04590-z), 2017-07-06
Supplement: 41598_2017_4590_MOESM1_ESM.pdf [file 41598_2017_4590_MOESM1_ESM.pdf]

## Supplemental materials

Polysulfide Na<sub>2</sub>S<sub>4</sub> regulates the activation of PTEN/Akt/CREB signaling and cytotoxicity mediated by 1,4-naphthoquinone, through formation of sulfur adducts

Yumi Abiko<sup>a, #</sup>, Yasuhiro Shinkai<sup>a, #</sup>, Takamitsu Unoki<sup>a</sup>, Reiko Hirose<sup>a</sup>, Takashi Uehara<sup>b</sup>, Yoshito Kumagai<sup>a, \*</sup>

<sup>a</sup> Faculty of Medicine, University of Tsukuba, Tsukuba, Ibaraki 305-8575, Japan

<sup>b</sup> Department of Medicinal Pharmacology, Graduate School of Medicine, Dentistry, and Pharmaceutical Sciences, Okayama University, Okayama 700-8530, Japan

# Y.A and Y.S. contributed equally in this study

\* Corresponding author. Yoshito Kumagai, Faculty of Medicine, University of Tsukuba, 1-1-1 Tennodai, Tsukuba, Ibaraki 305-8575, Japan

Tel: +81-29-853-3297; Fax: +81-29-853-3259; E-mail [yk-em-tu@md.tsukuba.ac.jp](mailto:yk-em-tu@md.tsukuba.ac.jp)

### Table of contents

|                               |   |
|-------------------------------|---|
| Supplementary Figure S1. .... | 2 |
| Supplementary Figure S2. .... | 3 |
| Supplementary Figure S3. .... | 4 |
| Supplementary Figure S4. .... | 5 |

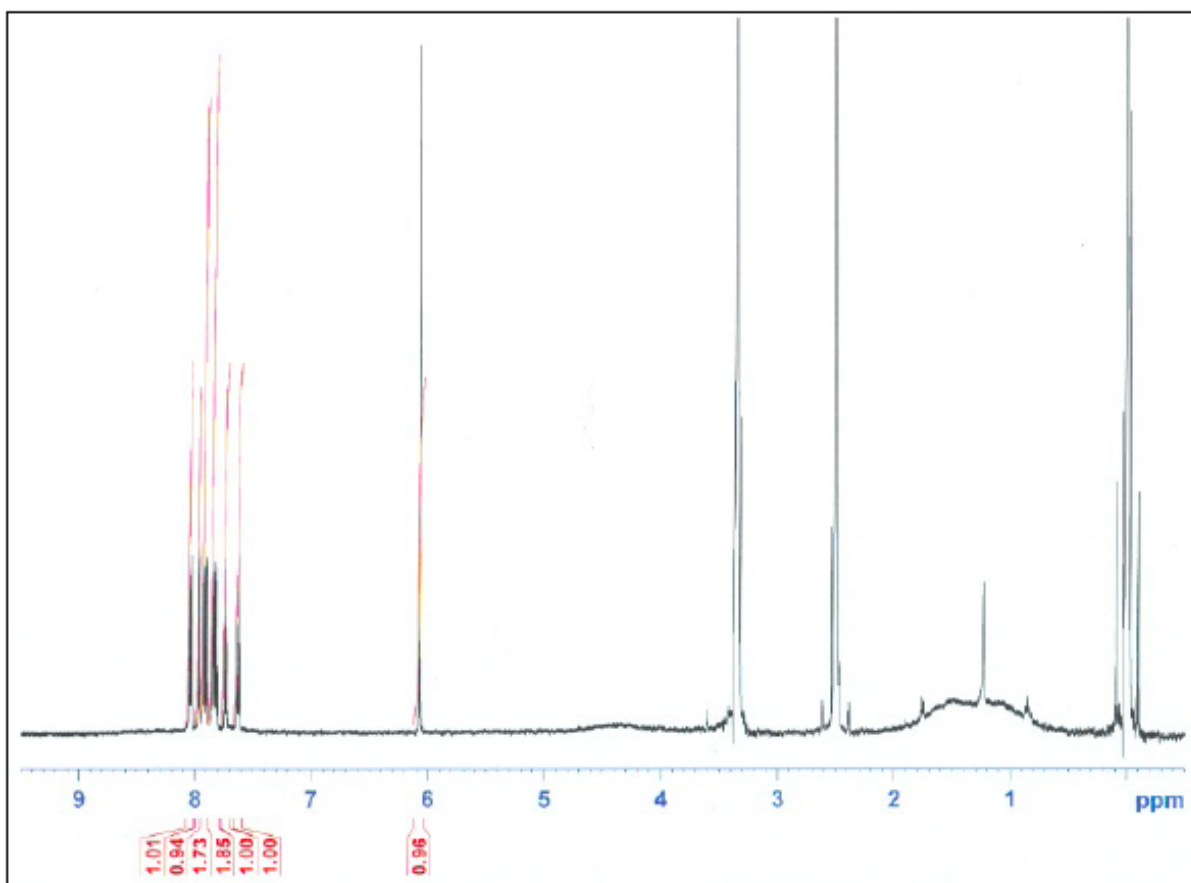

Figure S1.  $^1\text{H}$  NMR spectrum of a sulfur adduct of 1,4-NQ.

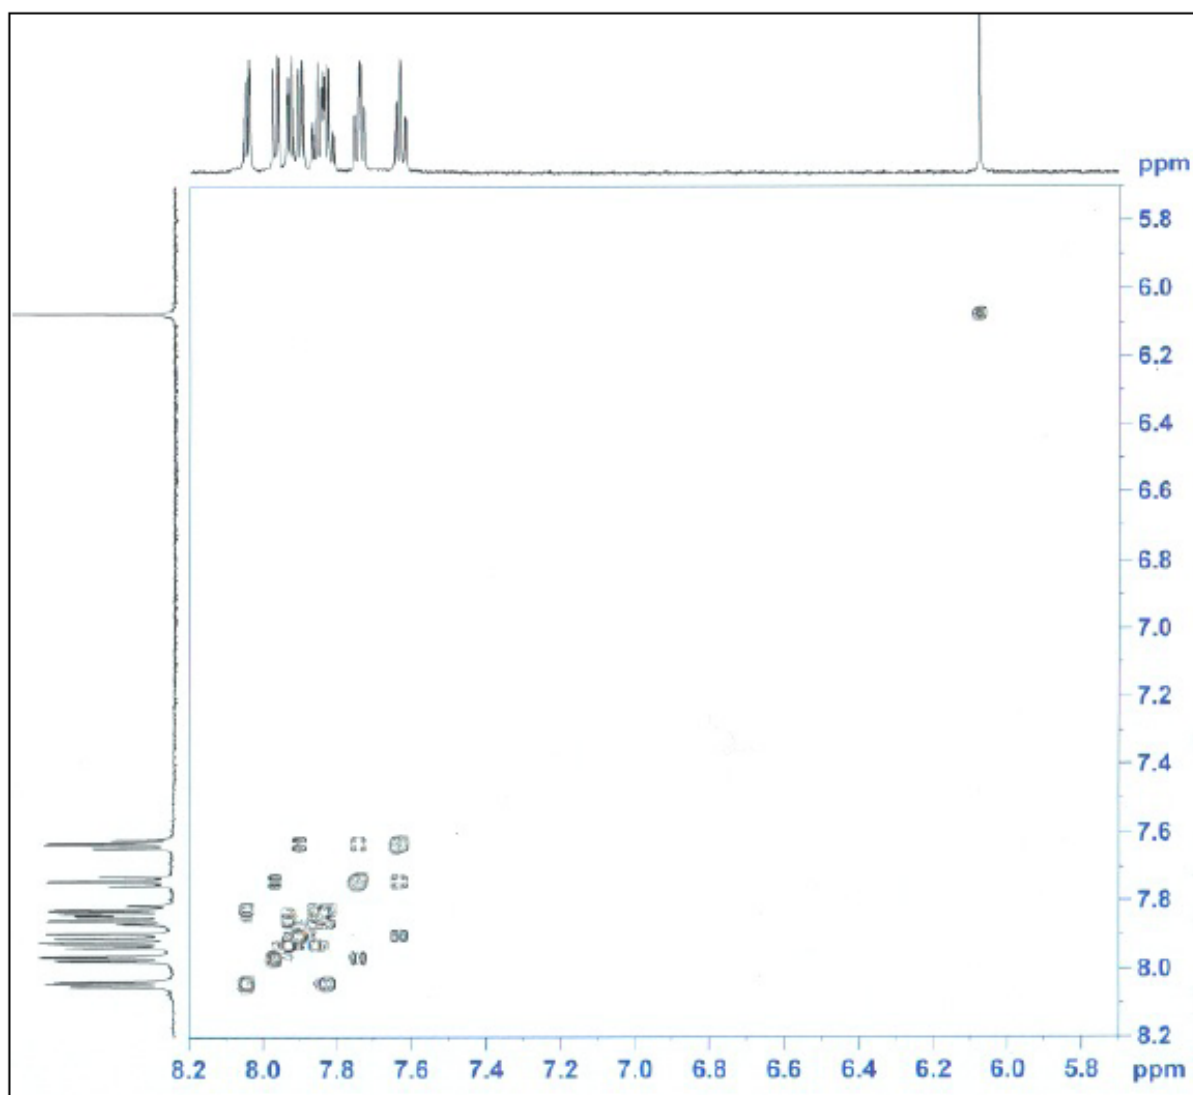

Figure S2.  $^1\text{H}$ - $^1\text{H}$  COSY NMR spectrum of a sulfur adduct of 1,4-NQ.

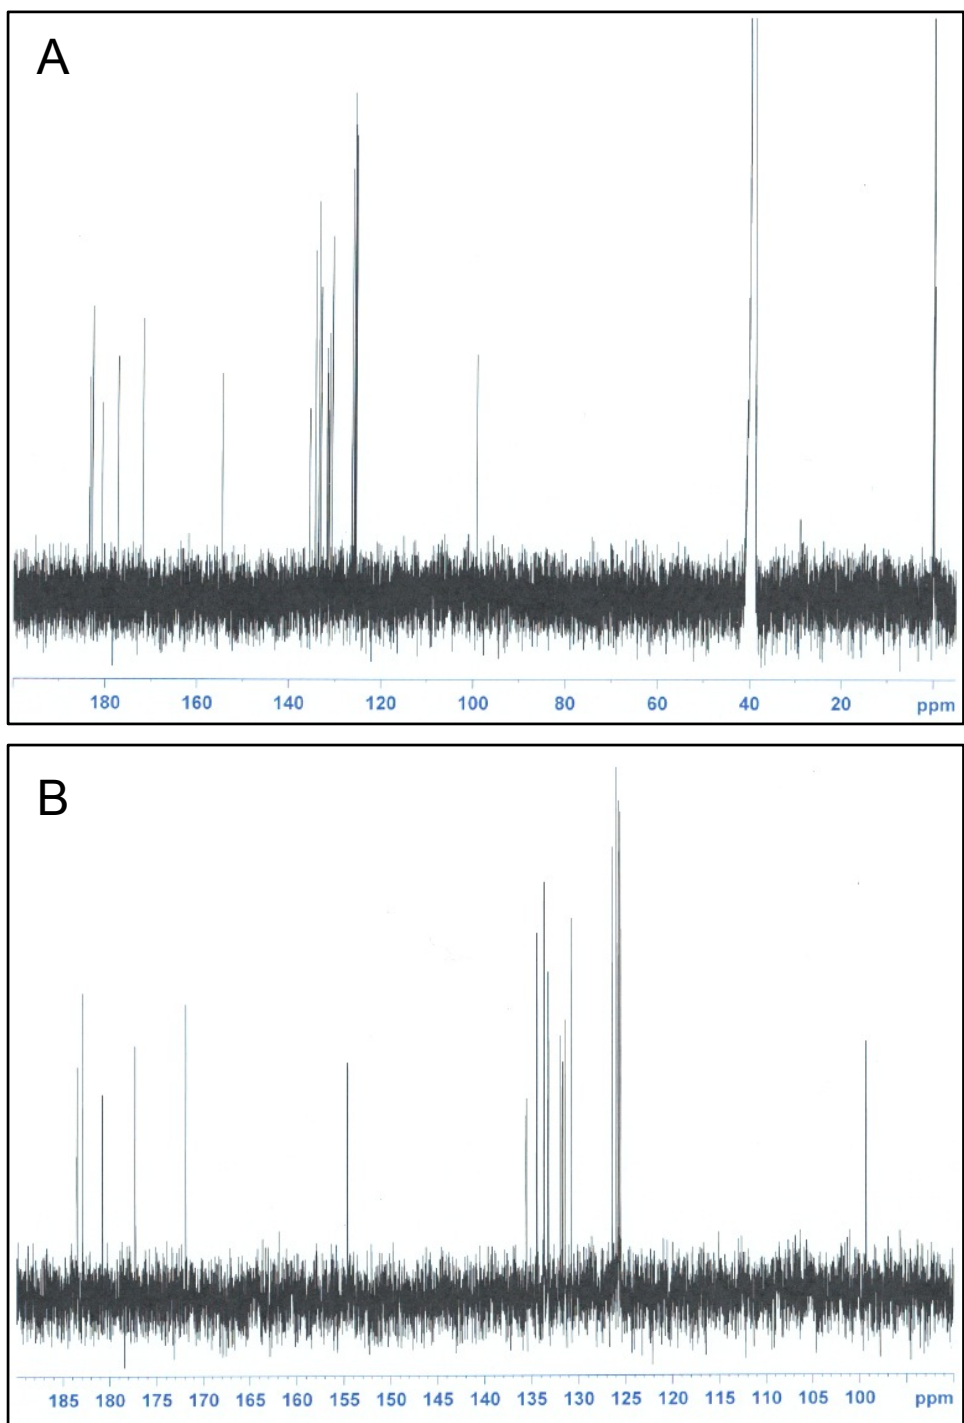

**Figure S3.**  $^{13}\text{C}$  NMR spectrum of a sulfur adduct of 1,4-NQ.  $^{13}\text{C}$  NMR spectrum (A) and a magnification of spectrum A (B) are shown.

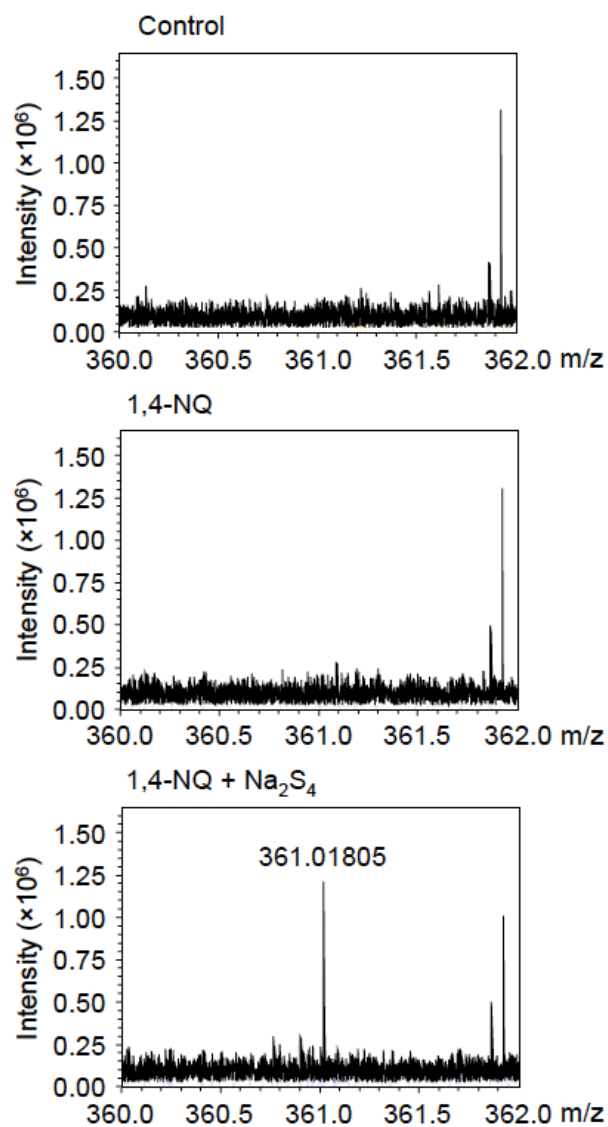

**Figure S4. Detection of 1,4-NQ sulfur adducts in the culture medium.** Mouse primary hepatocytes were exposed to 1,4-NQ (40  $\mu$ M) with or without 100  $\mu$ M Na<sub>2</sub>S<sub>4</sub> for 30 min, then 1,4-NQ sulfur adducts in the culture medium were detected by FT-ICR-MS.
